# Supplementary material for: Evaluation of the Impact of Storage Conditions on the Biogenic Amines Profile in Opened Wine Bottles
Source: PubMed Central journal article supplement (PMC6100326; doi:10.3390/molecules23051130), 2018-05-09
Supplement: molecules-23-01130-s001.pdf [file molecules-23-01130-s001.pdf]

1 Article

## 2 Evaluation of storage conditions impact on biogenic 3 amines profile in opened wine bottles

4 Justyna Płotka-Wasyłka<sup>1,\*</sup>, Vasil Simeonov<sup>2</sup> and Jacek Namieśnik<sup>1</sup>

5 <sup>1</sup> Department of Analytical Chemistry, Faculty of Chemistry, Gdańsk University of Technology, 11/12  
6 Narutowicza Street, 80-233 Gdańsk, Poland; e-mail:

7 <sup>2</sup> Faculty of Chemistry and Pharmacy, University of Sofia, 1 James Bourchier Blvd., Sofia 1126, Bulgaria;  
8 vsimeonov@chem.uni-sofia.bg

9 \* Correspondence: plotkajustyna@gmail.com; juswasyl@pg.edu.pl; Tel.: +48 58 347 21 10

10 Received: date; Accepted: date; Published: date

11 **Abstract:** A survey of biogenic amine (BA) profiles in opened wine bottles has been established to  
12 monitor the level of biogenic amines (BAs) in opened bottles against time and other conditions.  
13 Bottles of red and white wine were submitted to different temperatures, stopper type (screw cap,  
14 cork), and use of vacuum devices. A total of six wines made from a variety of grapes were obtained  
15 from vineyards from regions across Poland. Dispersive liquid-liquid microextraction-gas  
16 chromatography-mass spectrometry (DLLME-GC-MS) procedure for BAs determination was  
17 validated and applied for wine sample analysis. The total content of BAs from the set of  
18 immediately opened wine samples ranged from 442 to 929 µg/L for white wines, and 669 to 2244  
19 µg/L for red wines. The most abundant BAs in the analysed wines were histamine and putrescine.  
20 Considering the commercial availability of the analysed wines, there was no relationship between  
21 the presence of BAs in a given wine and their availability on the market. However, it was observed  
22 and confirmed by chemometric analysis that the different storage conditions employed in this  
23 experiment affect not only the BAs profile, but also the pH.

24 **Keywords:** Biogenic amines; chemometric analysis; DLLME, GC-MS; storage conditions; stopper  
25 type  
26

---

27

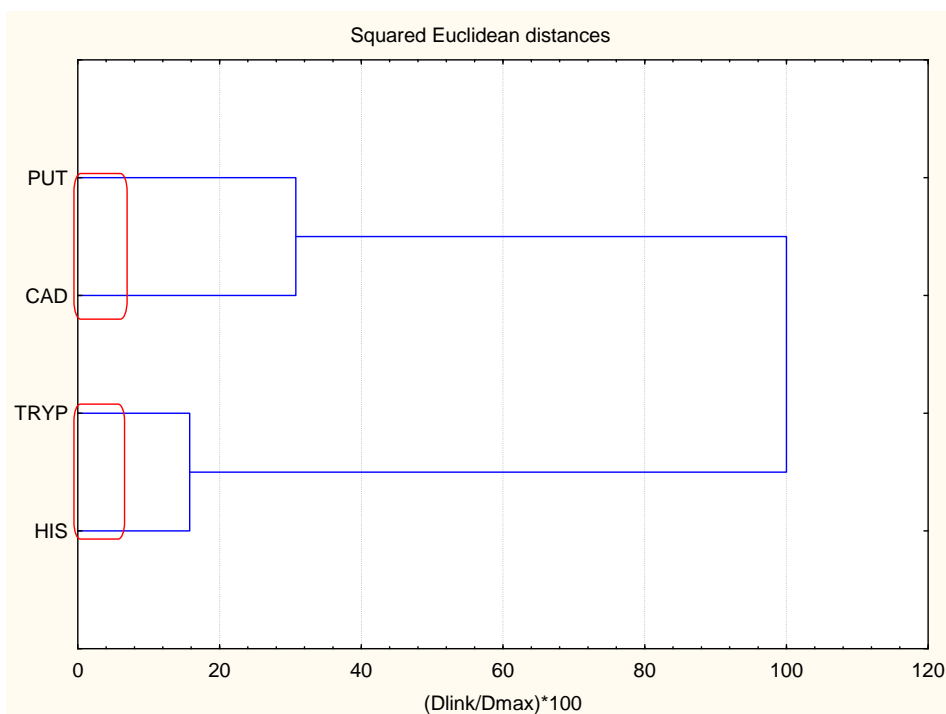

28

29 Figure 1 SI. Variable clustering for Wine B

30

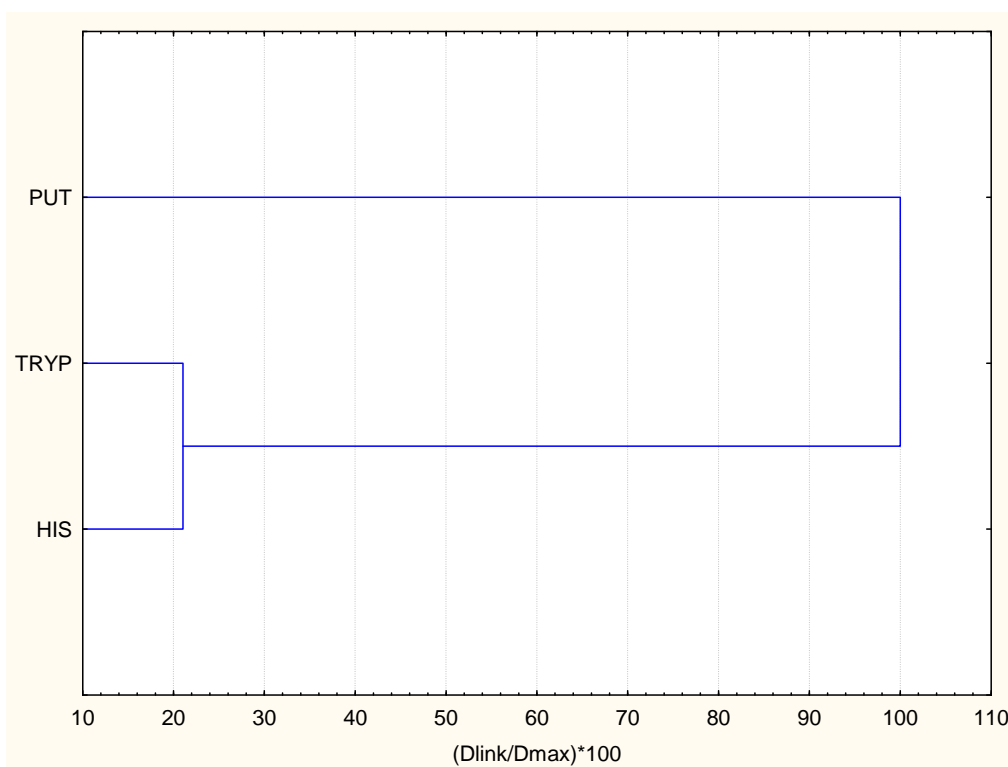

31

32 Figure 2 SI. Variable clustering for Wine C

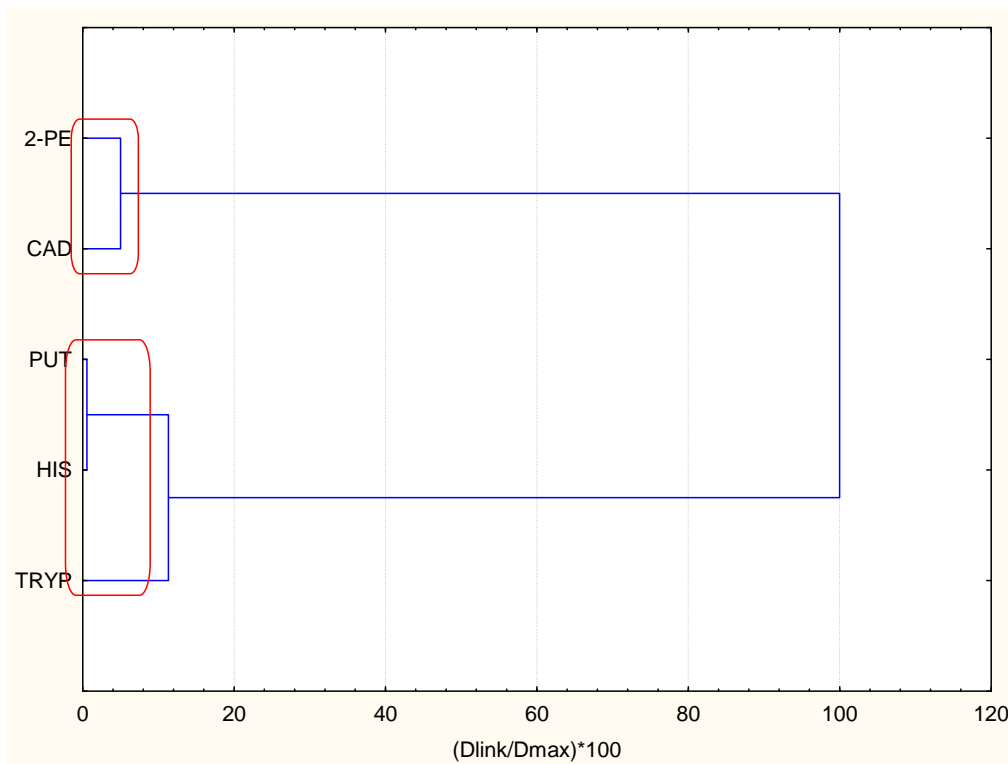

33

34 Figure 3 SI. Variable clustering for Wine D

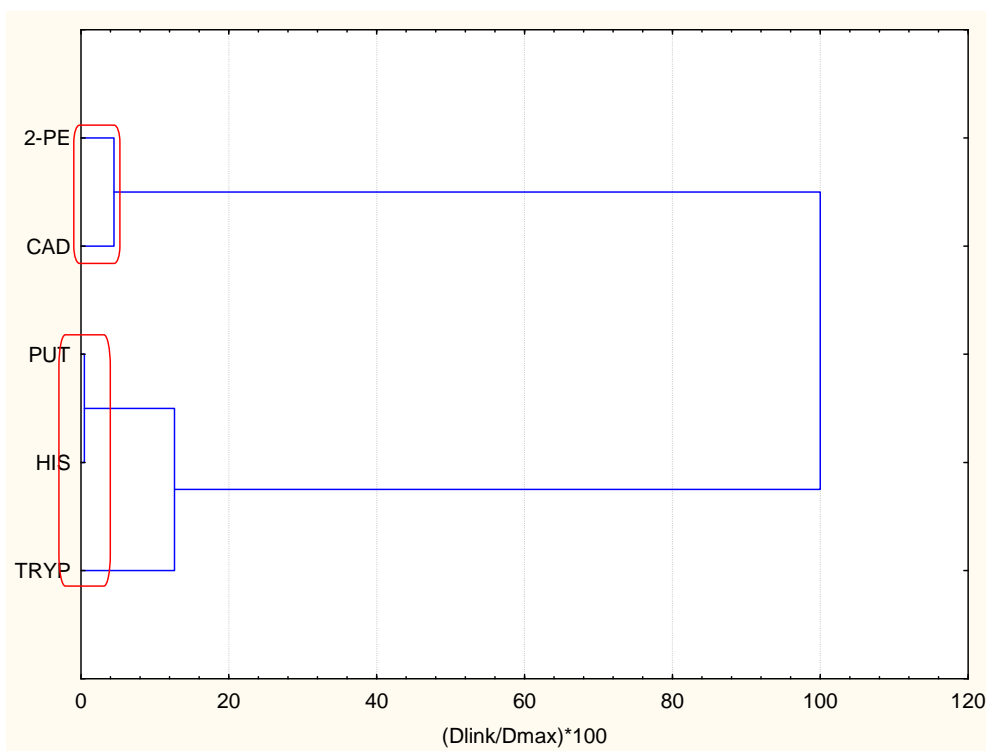

35

36 Figure 4 SI. Variable clustering for Wine E

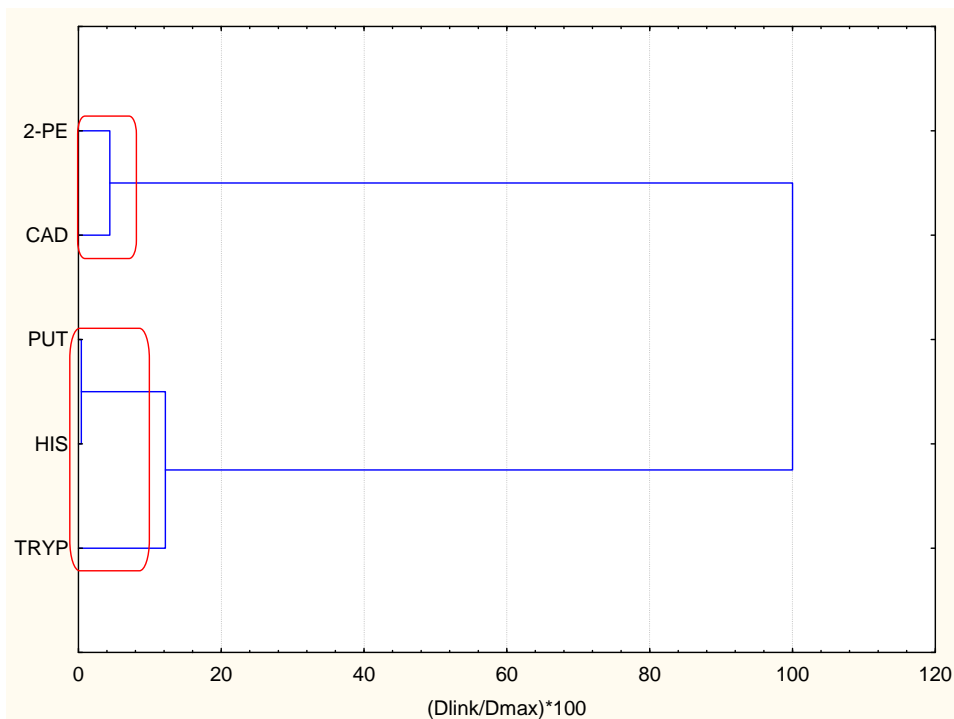

37

38 Figure 5 SI. Variable clustering for Wine F

39

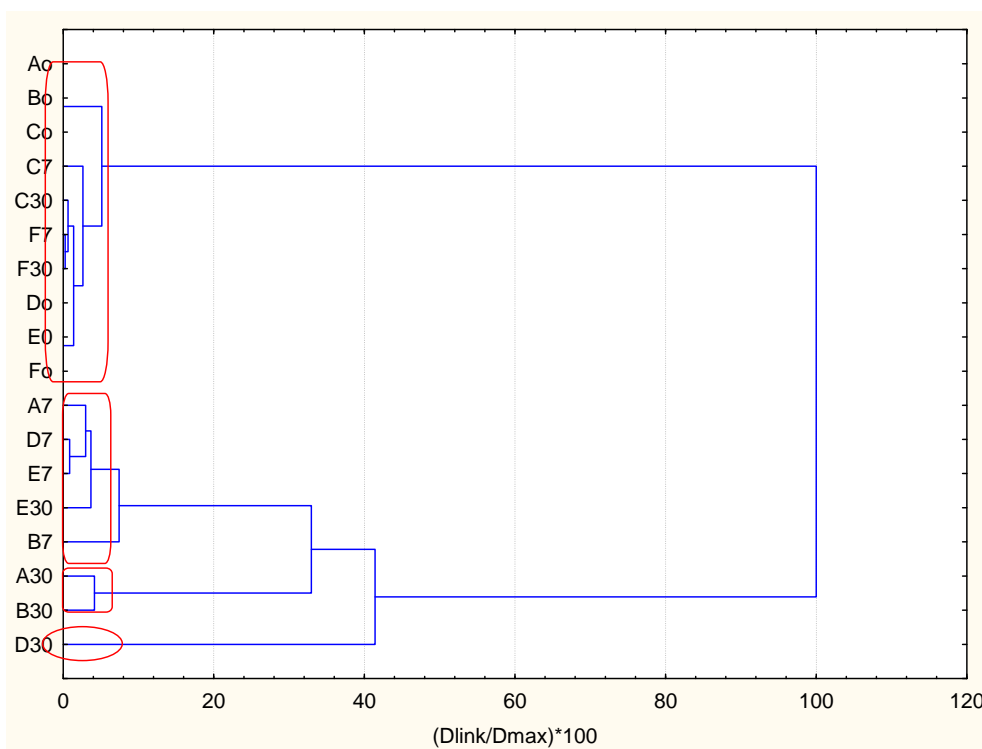

40

41 Figure 6 SI. Hierarchical dendrogram for wine samples (Wine B)

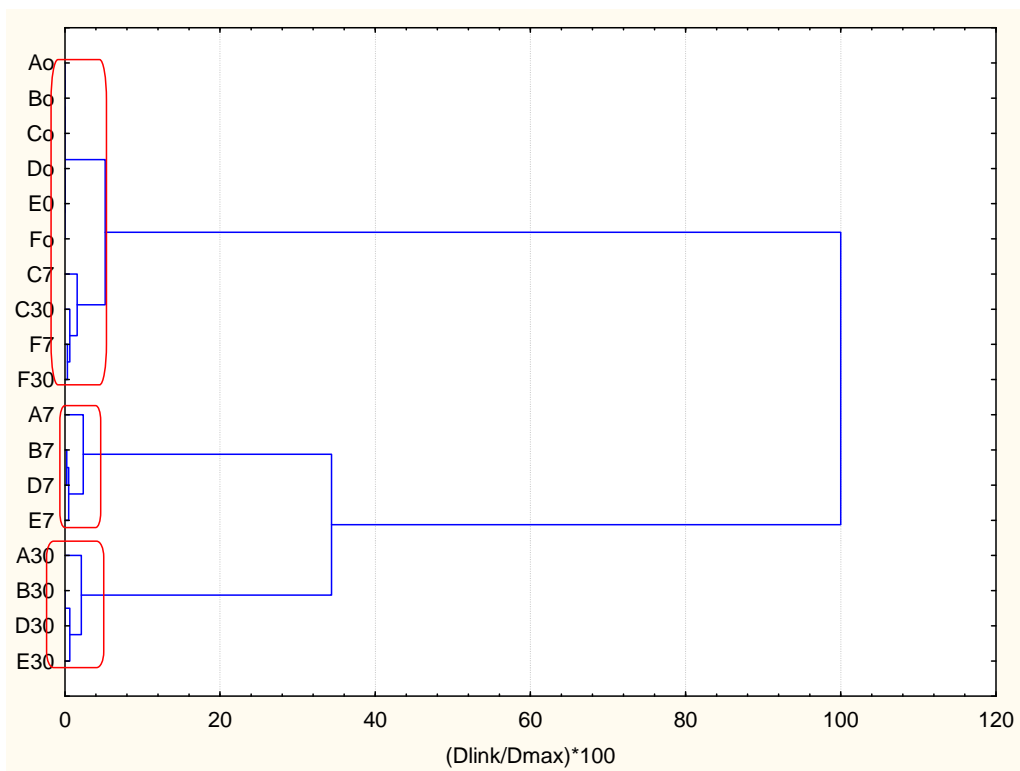

42

43 Figure 7 SI. Hierarchical dendrogram for wine samples (Wine C)

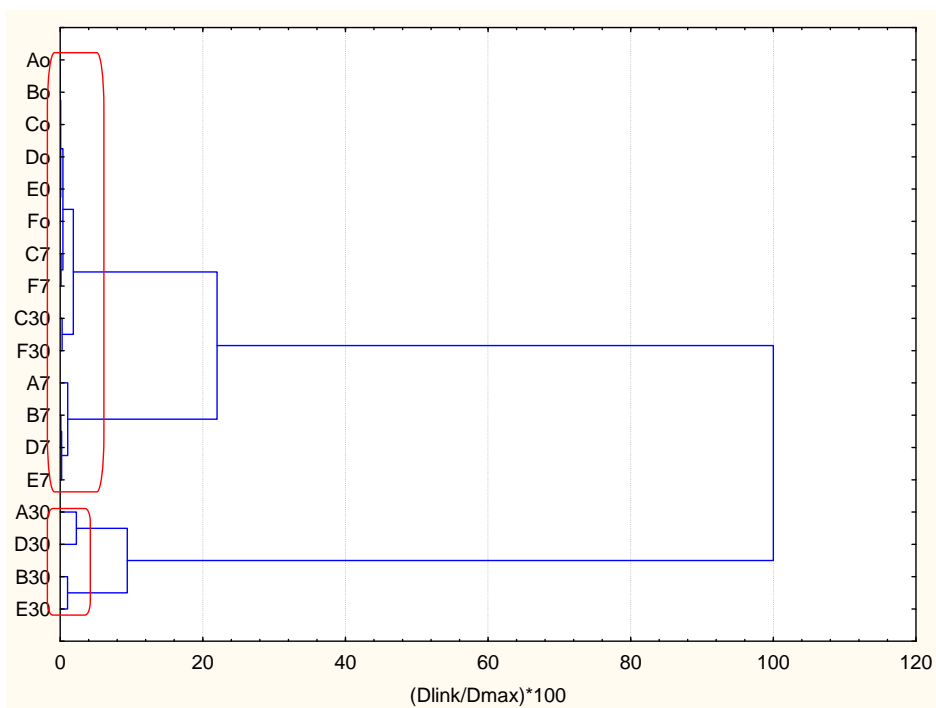

44

45 Figure 8 SI. Hierarchical dendrogram for wine samples (Wine D)

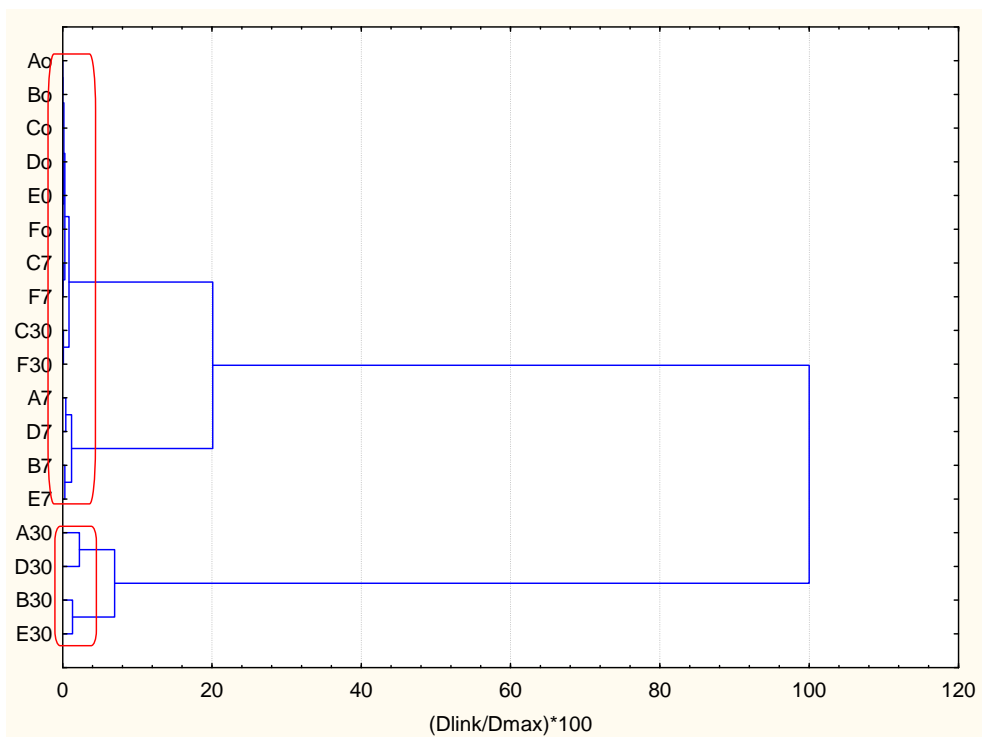

46

47 Figure 9 SI. Hierarchical dendrogram for wine samples (Wine E).

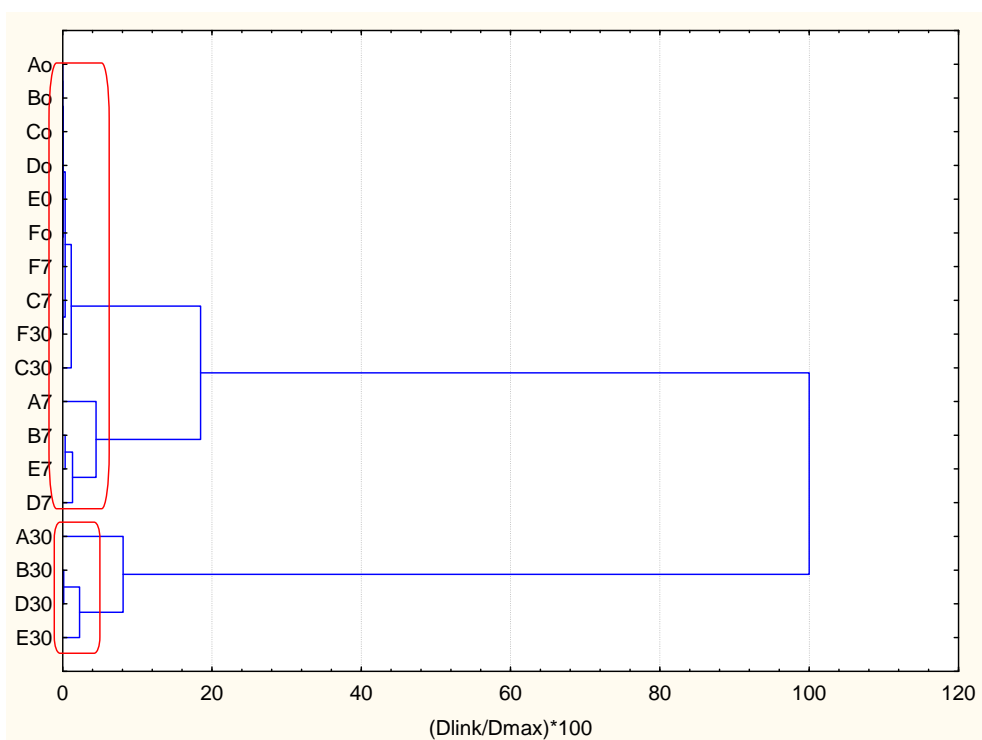

48

49 Figure 10 SI. Hierarchical dendrogram for wine samples (Wine F)

50
